# Supplementary material for: Performance insights into spray-dryer microencapsulated Bacillus thuringiensis cry pesticidal proteins with gum arabic and maltodextrin for effective pest control
Source: Springer Nature journal article supplement (doi:10.1007/s00253-023-12990-7), 2024-01-29

**SUPPLEMENTARY MATERIAL**

**Performance Insights into Spray-Dryer Microencapsulated *Bacillus thuringiensis*  
Cry Pesticidal Proteins with Gum Arabic and Maltodextrin for Effective Pest  
Control**

Jhones Luiz de Oliveira<sup>a,b</sup>, Isabel Gómez<sup>b</sup>, Jorge Sánchez<sup>b</sup>, Mario Soberón<sup>b</sup>, Ricardo  
Antonio Polanczyk<sup>a\*</sup> and Alejandra Bravo<sup>b\*</sup>

<sup>a</sup> Department of Agricultural Production Sciences, Faculty of Agronomy and Veterinary  
Sciences, São Paulo State University (UNESP), Jaboticabal, São Paulo 14884-900, Brazil

<sup>b</sup> Department of Molecular Microbiology, Instituto de Biotecnología, Universidad  
Nacional Autónoma de México, Cuernavaca, Morelos, Mexico

**Figure S1:** Evaluation of the protein profile in SDS-PAGE analysis. A) Protein profile of Bt *aizawai* (Bta strain) and Bt *kurstaki* (Btk and HD-1 strains) in different culture media (HCT, SP and Embrapa-EMB); B) Protein profile for non-encapsulated Bt formulations (1, Xentari<sup>®</sup>; 2, Dipel<sup>®</sup>; and 3, Dipel<sup>®</sup>/Xentari<sup>®</sup>) and microencapsulated samples (4, MP\_Bta; 5, MP\_Btk; and 6, MP\_Btk/Bta).

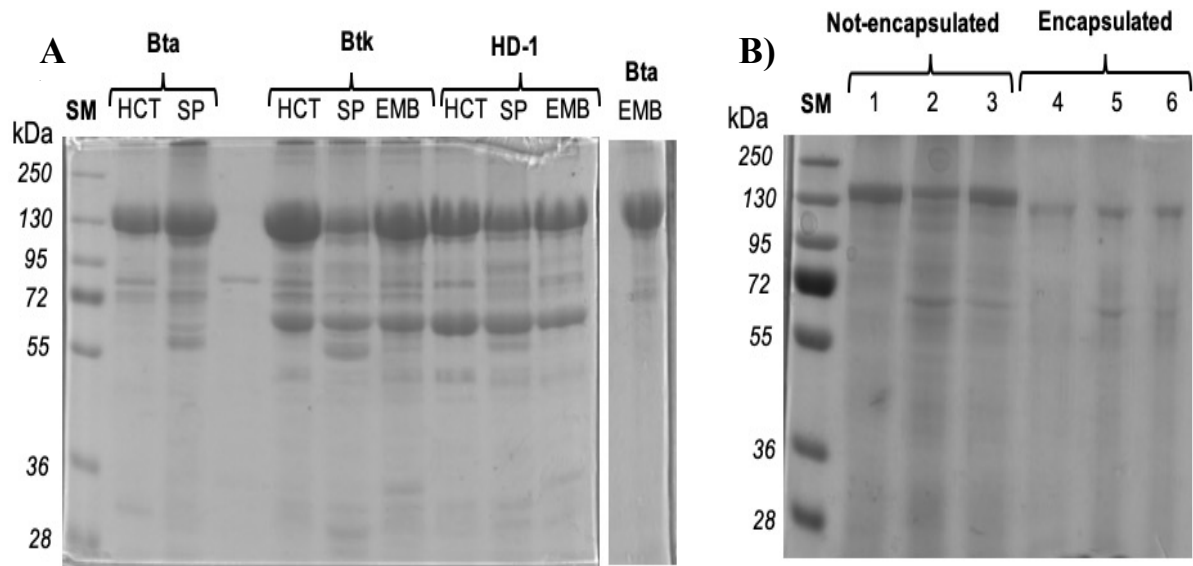

**Figure S2:** Analysis of activation efficiency after Protein quantification of SDS-PAGE profiles. A) Protein profile after activation with trypsin; B) Protein profile after activation with chymotrypsin; C) Protein profile after activation with midgut juice; Formulations: 1, Xentari®; 2, Dipel®; 3, Dipel®/Xentari®; 4, MP\_Bta; 5, MP\_Btk; and 6, MP\_Btk/Bta.

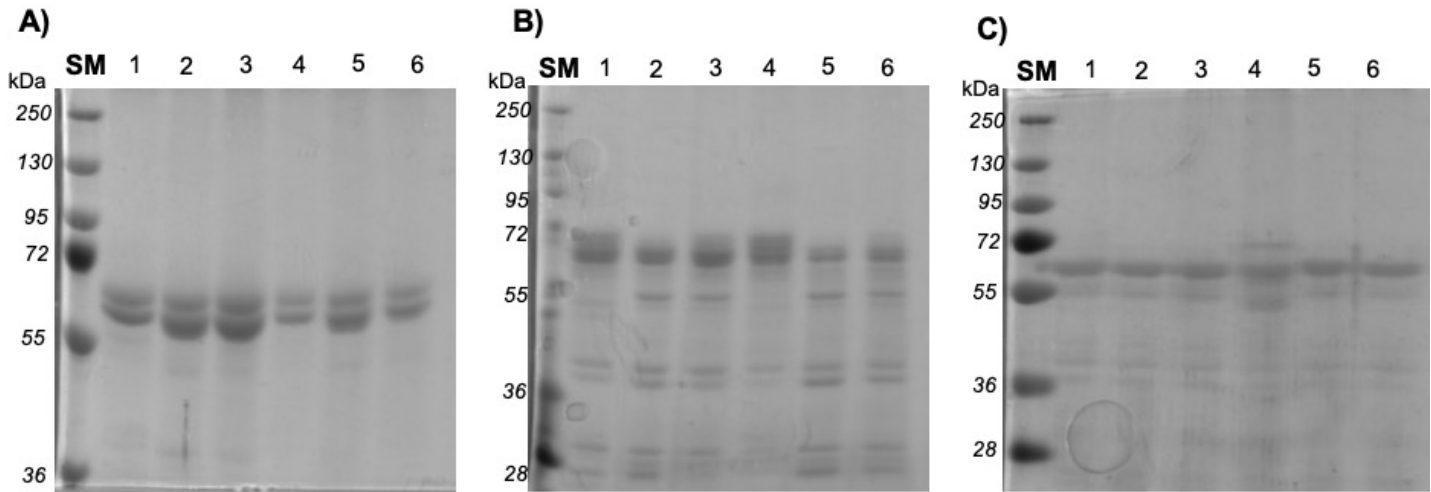

**Figure S3.** Binding interaction of formulations to BBMV from *Spodoptera frugiperda* (A and B) and *Manduca sexta* (C and D). A) A sample of 10 µg SfBBMV was incubated with 1 to 15 µg of Cry activated toxins present in Xentari and MP\_Bta formulations. B) A sample of 10 µg of SfBBMV was incubated with 1 to 15 µg of activated toxins present in Dipel and MP\_Btk formulations. C) A sample of 10 µg of MsBBMV was incubated with 1 to 15 µg of toxins present in Xentari and MP\_Bta formulations. D) A sample of 10 µg of MsBBMV was incubated with 1 to 15 µg of activated toxins present in Dipel and MP\_Btk formulations.

**A** Binding of Xentari and MP-Bta to *S. frugiperda* BBMV

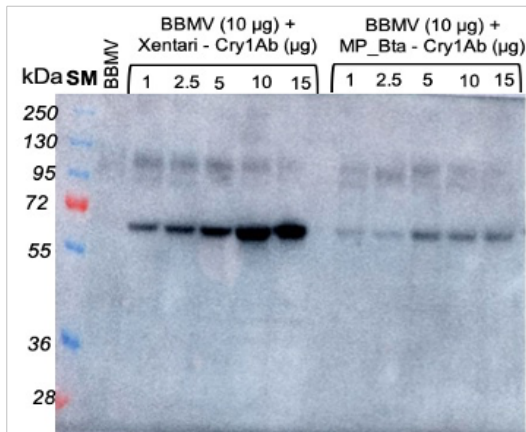

**B** Binding of Dipel and MP-Btk to *S. frugiperda* BBMV

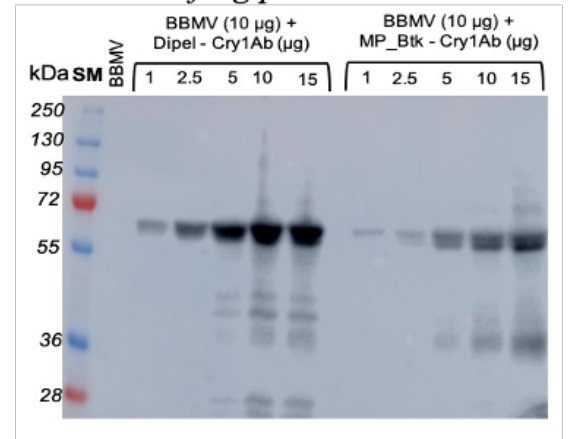

**C** Binding of Xentari and MP-Bta to *M. sexta* BBMV

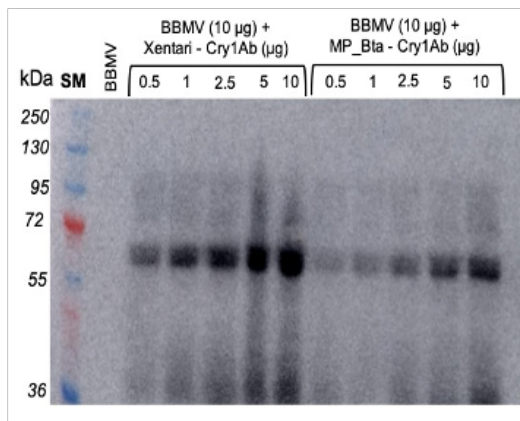

**D** Binding of Dipel and MP-Btk to *M. sexta* BBMV

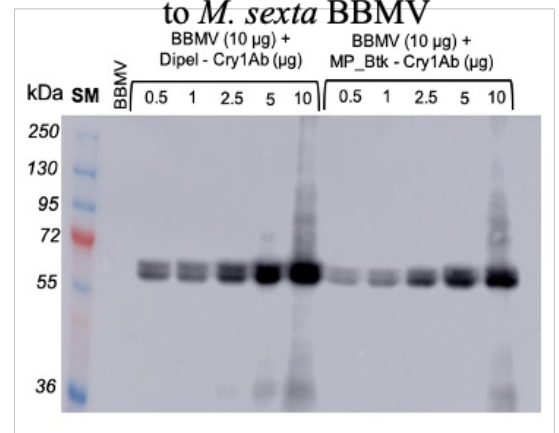

**Figure S4:** ELISA binding analysis of Xentari, Dipel, MP\_Bta and MP\_Btk formulation containing trypsin-activated Cry1Ab toxin to SfBBMV (A) and MsBBMV (B).

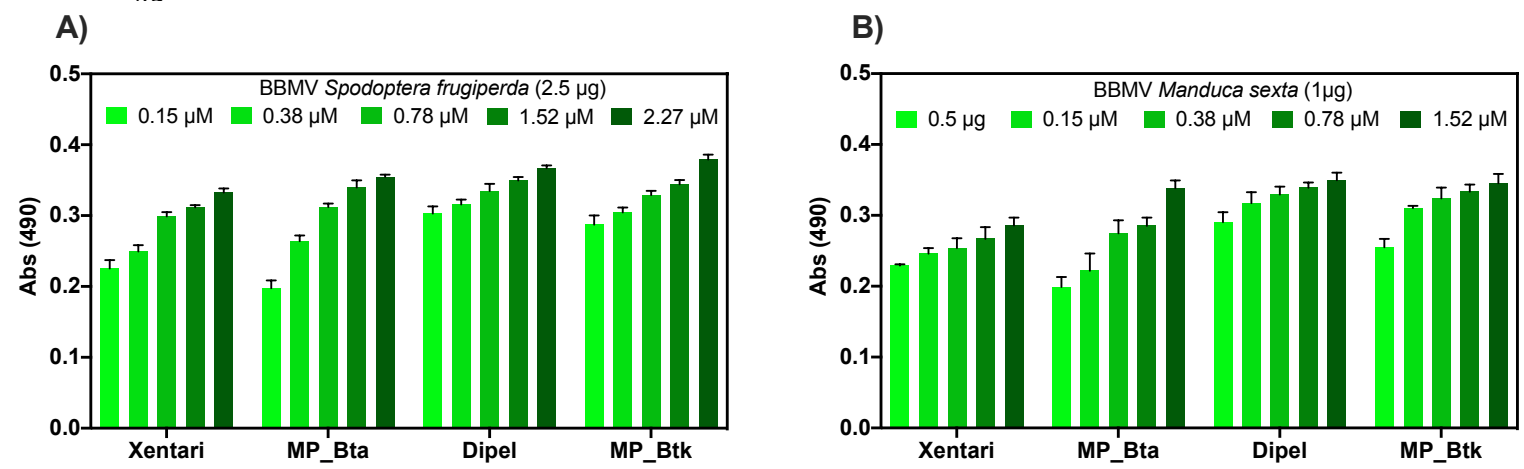

Supplement: MOESM1 [file 253_2023_12990_MOESM1_ESM.pdf]
